# Supplementary material for: Self-Directed Interventions to Promote Weight Loss: A Systematic Review of Reviews
Source: PubMed Central journal article supplement (PMC3961624; doi:10.2196/jmir.2857), 2014-02-19
Supplement: jmir_v16i2e58_app1.pdf [file jmir_v16i2e58_app1.pdf]

Multimedia Appendix 1

Selection of the final 20 reviews applying inclusion criteria

| Author(s)                                  | Date        | Review Superseded | Systematic Review | Included interventions assessed Weight related outcome | Included interventions were self-directed | Reviewed interventions including interactive and self-regulatory components |
|--------------------------------------------|-------------|-------------------|-------------------|--------------------------------------------------------|-------------------------------------------|-----------------------------------------------------------------------------|
| <b>1. Arem, H &amp; Irwin, M</b>           | <b>2011</b> | <b>No</b>         | <b>Yes</b>        | <b>Yes</b>                                             | <b>Yes</b>                                | <b>Yes</b>                                                                  |
| 2. Berkel, L. A & Carlos-Poston, W. S      | 2005        | No                | No                | Yes                                                    | Yes                                       | Yes                                                                         |
| <b>3. Cole-Lewis, H &amp; Kershaw, T</b>   | <b>2010</b> | <b>No</b>         | <b>Yes</b>        | <b>Yes</b>                                             | <b>Yes</b>                                | <b>Yes</b>                                                                  |
| <b>4. Enwald, H. P &amp; Huotari, M. L</b> | <b>2010</b> | <b>No</b>         | <b>Yes</b>        | <b>Yes</b>                                             | <b>Yes</b>                                | <b>Yes</b>                                                                  |

|                                            |             |           |            |            |            |            |
|--------------------------------------------|-------------|-----------|------------|------------|------------|------------|
| 5. Galani, C &<br>Schneider, H             | 2007        | No        | Yes        | Yes        | No         | No         |
| 6. Garaulet, M &<br>Perez de Heredia, F    | 2009        | No        | No         | Yes        | Yes        | Yes        |
| <b>7. Gordon, J &amp;<br/>Watson, M</b>    | <b>2011</b> | <b>No</b> | <b>Yes</b> | <b>Yes</b> | <b>Yes</b> | <b>Yes</b> |
| <b>8. Harris, J &amp; Felix,<br/>L</b>     | <b>2011</b> | <b>No</b> | <b>Yes</b> | <b>Yes</b> | <b>Yes</b> | <b>Yes</b> |
| <b>9. Hemmingsson, E<br/>&amp; Page, A</b> | <b>2001</b> | <b>No</b> | <b>Yes</b> | <b>Yes</b> | <b>Yes</b> | <b>Yes</b> |
| 10. Holt, J & Warren,<br>L                 | 2006        | No        | No         | Yes        | No         | Yes        |
| <b>11. Keller, C &amp;<br/>Records, K</b>  | <b>2008</b> | <b>No</b> | <b>Yes</b> | <b>Yes</b> | <b>Yes</b> | <b>Yes</b> |
| <b>12. Kroeze, W &amp;<br/>Wekman, A</b>   | <b>2006</b> | <b>No</b> | <b>Yes</b> | <b>Yes</b> | <b>Yes</b> | <b>Yes</b> |
| <b>13. Lemmens, V. E &amp;</b>             | <b>2008</b> | <b>No</b> | <b>Yes</b> | <b>Yes</b> | <b>Yes</b> | <b>Yes</b> |

*Oenema, A*

|                                                  |             |            |            |            |            |            |
|--------------------------------------------------|-------------|------------|------------|------------|------------|------------|
| <b>14. Lombard, C. B &amp;<br/>Deeks, A. A</b>   | <b>2009</b> | <b>No</b>  | <b>Yes</b> | <b>Yes</b> | <b>Yes</b> | <b>Yes</b> |
| <b>15. Loveman, E &amp;<br/>Frampton, G. K</b>   | <b>2011</b> | <b>No</b>  | <b>Yes</b> | <b>Yes</b> | <b>Yes</b> | <b>Yes</b> |
| <b>16. Manzoni, G. M &amp;<br/>Pagnini, F</b>    | <b>2011</b> | <b>No</b>  | <b>Yes</b> | <b>Yes</b> | <b>Yes</b> | <b>Yes</b> |
| 17. Maon, S &<br>Edirippulige, S                 | 2012        | No         | Yes        | No         | Yes        | No         |
| 18. Miller, Y. D &<br>Dunstan, D. W              | 2004        | No         | Yes        | Yes        | No         | No         |
| <b>19. Neve &amp; Morgan</b>                     | <b>2010</b> | <b>Yes</b> | <b>Yes</b> | <b>Yes</b> | <b>Yes</b> | <b>Yes</b> |
| 20. Norris, S. L &<br>Zhang, X                   | 2005        | No         | Yes        | No         | No         | No         |
| <b>21. Norman, G. J &amp;<br/>Zabinski, M. F</b> | <b>2007</b> | <b>No</b>  | <b>Yes</b> | <b>Yes</b> | <b>Yes</b> | <b>Yes</b> |

|                                                      |             |           |            |            |            |            |
|------------------------------------------------------|-------------|-----------|------------|------------|------------|------------|
| 22. Perry, K. J &<br>Hickson, M                      | 2011        | No        | Yes        | Yes        | No         | Yes        |
| <b>23. Reed, V. A &amp;<br/>Schifferdecker, K. E</b> | <b>2011</b> | <b>No</b> | <b>Yes</b> | <b>Yes</b> | <b>Yes</b> | <b>Yes</b> |
| <b>24. Saperstein, S. L<br/>&amp; Atkinson, N. L</b> | <b>2007</b> | <b>No</b> | <b>Yes</b> | <b>Yes</b> | <b>Yes</b> | <b>Yes</b> |
| 25. Shaw, K. A &<br>Gennat, H. C                     | 2006        | No        | Yes        | Yes        | No         | No         |
| 26. Shaw, K. A &<br>O'Rourke, P                      | 2005        | No        | Yes        | Yes        | No         | Yes        |
| <b>27. Tuah, N. A &amp;<br/>Amiel, C</b>             | <b>2011</b> | <b>No</b> | <b>Yes</b> | <b>Yes</b> | <b>Yes</b> | <b>Yes</b> |
| <b>28. Turk, M. W &amp;<br/>Yang, K</b>              | <b>2009</b> | <b>No</b> | <b>Yes</b> | <b>Yes</b> | <b>Yes</b> | <b>Yes</b> |
| 29. Volpe, S. L                                      | 2006        | No        | Yes        | No         | No         | No         |
| <b>30. Weinstein, P. K</b>                           | <b>2006</b> | <b>No</b> | <b>Yes</b> | <b>Yes</b> | <b>Yes</b> | <b>Yes</b> |

|                                  |             |           |            |            |            |            |
|----------------------------------|-------------|-----------|------------|------------|------------|------------|
| <b>31. Wieland, L. S</b>         | <b>2012</b> | <b>No</b> | <b>Yes</b> | <b>Yes</b> | <b>Yes</b> | <b>Yes</b> |
| 32. Winett, R. A &<br>Tate, D. F | 2005        | No        | No         | Yes        | Yes        | Yes        |

*Note.* Selected reviews that meet inclusion criteria are highlighted in **Bold**.
