# Supplementary material for: Self-Directed Interventions to Promote Weight Loss: A Systematic Review of Reviews
Source: PubMed Central journal article supplement (PMC3961624; doi:10.2196/jmir.2857), 2014-02-19
Supplement: jmir_v16i2e58_app2.pdf [file jmir_v16i2e58_app2.pdf]

**Multimedia Appendix 2.** Review characteristics.

| <b>First Author, Year</b> | <b>Type of review, intervention mode, search period &amp; OQAQ score</b>      | <b>Aim</b>                                                                               | <b>Selection criteria</b>                                                                                                                                                                                                      | <b>No of interventions, participants &amp; sample type</b>                                                           | <b>Key outcomes</b>                                         | <b>Reported intervention content and interactive components</b>                                                                 | <b>Results and conclusions</b>                                                                                             |
|---------------------------|-------------------------------------------------------------------------------|------------------------------------------------------------------------------------------|--------------------------------------------------------------------------------------------------------------------------------------------------------------------------------------------------------------------------------|----------------------------------------------------------------------------------------------------------------------|-------------------------------------------------------------|---------------------------------------------------------------------------------------------------------------------------------|----------------------------------------------------------------------------------------------------------------------------|
| Arem (2011)               | Descriptive<br>Internet-based<br>2001 to Jan 2009<br>OQAQ=10                  | To examine the strengths and weaknesses of internet-based interventions                  | Inclusion: RCT; overweight or obese adults; weight loss or maintenance; web-based interventions                                                                                                                                | Interventions = 9<br>N= 4282<br>Sample = community; 79% female; predominately white                                  | Weight loss and maintenance                                 | Online tailoring; personalized emails on progress; self-monitoring diaries; individual feedback; structured weight loss lessons | 8/9 relevant studies. No statistical pooling. High attrition rate. Effectiveness of internet interventions remains unclear |
| Cole-Lewis (2011)         | Descriptive<br>Text messaging (mobile phones)<br>May and June 2009<br>OQAQ=14 | To investigate the effectiveness of text messaging for disease prevention and management | Inclusion: Randomized or quasi-experimental controlled trials; text messaging for disease prevention or management; measures in health behavior, health outcomes, and/or clinical outcomes using pre post-tests; peer reviewed | Interventions = 12<br>N= 2365<br>Sample = predominately community; in 3 studies, women were greatly over-represented | Weight change. Most studies targeted other health behaviors | Text messaging; automated messaging; tailored messages                                                                          | 2/12 relevant studies. Weight loss of 2.9 and 4.5kg. Text messaging effective in weight loss and diabetes management       |

|                    |                                                                             |                                                                                                                                                                   |                                                                                                                                                                                                          |                                                                                    |                                              |                                                                                                                                                                                                          |                                                                                                                                                                                                                                                     |
|--------------------|-----------------------------------------------------------------------------|-------------------------------------------------------------------------------------------------------------------------------------------------------------------|----------------------------------------------------------------------------------------------------------------------------------------------------------------------------------------------------------|------------------------------------------------------------------------------------|----------------------------------------------|----------------------------------------------------------------------------------------------------------------------------------------------------------------------------------------------------------|-----------------------------------------------------------------------------------------------------------------------------------------------------------------------------------------------------------------------------------------------------|
| Enwald (2010)      | Descriptive<br>E-health<br>Not restricted by publication date<br>OQAQ=12    | Evaluation of second generation interventions to prevent obesity and its associated problems                                                                      | Inclusion: RCT or Quasi-experimental; second generation technology; health behavior associated to nutrition; weight management and physical activity assessed using physiological or behavioral outcomes | Interventions = 23<br>N= 12417<br>Sample = unclear; gender NS; predominately white | Weight change                                | Personalized feedback as the tailoring mechanism used in most studies                                                                                                                                    | 5/23 relevant studies. Only two studies reporting weight loss of 4.1 and 5.3kg. Nutrition interventions more effective than PA promotion programs. Tailoring more effective in nutrition interventions than physical activity and weight management |
| Gordon (2011)      | Descriptive<br>Community pharmacy-based<br>Jan 1999 to June 2009<br>OQAQ=10 | To assess the cost-effectiveness and effectiveness of community pharmacy weight management interventions                                                          | Inclusion: Community pharmacy setting; weight management as primary focus                                                                                                                                | Interventions = 10<br>N= 2583<br>Sample = service users                            | Weight change                                | Self-monitoring and goal setting; questionnaires; diaries; information sheets                                                                                                                            | 2/10 relevant studies. Did not synthesize quantitative data. Weight loss in one study at 3 and 6 months. Effectiveness remains unclear                                                                                                              |
| Harris (2011)      | Meta-analysis<br>E-health<br>Jan 1990 to Nov 2009<br>OQAQ=17                | To assess the effectiveness and cost-effectiveness of e-health interventions for dietary behavior change and to determine the effective components and mechanisms | Inclusion: RCT; adolescents and adults; interactive and tailored software; dietary behaviors and clinical outcomes                                                                                       | Interventions = 43<br>N= Not stated<br>Sample = unclear;                           | Dietary behavior and clinical outcomes       | Tailored software with goal setting and feedback components; personalized emails; self-monitoring diaries; personal digital assistant and automated telephone service; computer; CD-ROM; kiosks; minitel | 22/43 relevant studies. Effectiveness and cost-effectiveness of e-health interventions inconclusive                                                                                                                                                 |
| Hemmingsson (2001) | Descriptive<br>Internet-based<br>1966 to 2001                               | A summary of physical activity behavior change adherence influences                                                                                               | Inclusion: Overweight and obese adults; contain PA behavior change adherence information                                                                                                                 | Interventions = 7<br>N= 651<br>Sample = unclear                                    | Physical activity levels and weight/fat loss | Insufficient description of intervention content; peer support; telephone social                                                                                                                         | 2/7 relevant studies. Did not synthesize quantitative data. Various factors influencing PA behavior change.                                                                                                                                         |

|                |             |                                                                                                                                   |                                                                                                                                                                                                |                                                                                                |                                                         |                                                                                                                                                                                                               |                                                                                                                                                                                                          |                                                       |
|----------------|-------------|-----------------------------------------------------------------------------------------------------------------------------------|------------------------------------------------------------------------------------------------------------------------------------------------------------------------------------------------|------------------------------------------------------------------------------------------------|---------------------------------------------------------|---------------------------------------------------------------------------------------------------------------------------------------------------------------------------------------------------------------|----------------------------------------------------------------------------------------------------------------------------------------------------------------------------------------------------------|-------------------------------------------------------|
|                |             | OQAAQ=8                                                                                                                           |                                                                                                                                                                                                |                                                                                                |                                                         |                                                                                                                                                                                                               | support and logins described in two relevant studies                                                                                                                                                     | Evidence not conclusive and warrants further research |
| Keller (2008)  | Descriptive | A description of intervention studies for guiding weight management interventions                                                 | Inclusion: Weight loss or body composition outcome; PA interventions; postpartum women; RCT                                                                                                    | Interventions = 6<br>N= 298<br>Sample = community; 100% female; predominately white            | Weight and fat loss                                     | Food and activity diaries for self-monitoring and goal setting; Harris-benedict equation; target heart rate percentage; motivational interviewing; informational brochure; written lessons; telephone contact | 3/6 relevant studies. Weight loss range of 1.6 to 7.8kg. Significant changes in body composition in women found in relevant studies. No significant changes in weight loss. Effectiveness remain unclear |                                                       |
|                |             | OQAAQ=9                                                                                                                           |                                                                                                                                                                                                |                                                                                                |                                                         |                                                                                                                                                                                                               |                                                                                                                                                                                                          |                                                       |
| Kroeze (2006)  | Descriptive | A review of the efficacy of nutrition education and expert-driven computer-tailored physical activity interventions               | Inclusion: Computer tailored interventions targeting PA or diet; RCT with pre and post-test; adults; studies in English; delivered in a “nonpersonal” way without person-to-person counselling | Interventions = 31<br>N= 84-1,317<br>Sample = unclear                                          | Change in health behavior (PA and diet) and weight loss | Tailored and interactive feedback; computer-tailored letters; pamphlets; brochures; multimedia (text and video); computer-tailored print materials                                                            | 2/31 relevant studies. Did not synthesize quantitative data. Evidence for computer-tailored interventions is strong. However, small effect size in most studies. Follow up periods only up to 6 months   |                                                       |
|                |             | OQAAQ=12                                                                                                                          |                                                                                                                                                                                                |                                                                                                |                                                         |                                                                                                                                                                                                               |                                                                                                                                                                                                          |                                                       |
| Lemmens (2008) | Descriptive | To examine the efficacy of obesity prevention interventions and to identify the effective components for intervention development | Inclusion: Dietary intake; PA or both; overweight individuals; RCT; non-RCT or interrupted time series designs; minimum 3 months follow up                                                     | Interventions = 9<br>N= not stated<br>Sample = community; predominately white; 20-79 years old | BMI and weight loss                                     | Emailed exercise and dietary programmes; self-monitoring                                                                                                                                                      | 3/9 relevant studies. Only one study targeting diet and PA demonstrated significant weight loss of 1.6kg. Inconclusive findings for the effectiveness of home-based interventions                        |                                                       |
|                |             | OQAAQ=9                                                                                                                           |                                                                                                                                                                                                |                                                                                                |                                                         |                                                                                                                                                                                                               |                                                                                                                                                                                                          |                                                       |
| Lombard (2009) | Descriptive | To summarize weight gain prevention                                                                                               | Inclusion: Adults; weight gain prevention;                                                                                                                                                     | Interventions = 8<br>N= 2282                                                                   | Weight loss                                             | Self-monitoring; tailored advice;                                                                                                                                                                             | 7/9 relevant studies. Small differences in weight lost between                                                                                                                                           |                                                       |
|                |             | OQAAQ=9                                                                                                                           |                                                                                                                                                                                                |                                                                                                |                                                         |                                                                                                                                                                                                               |                                                                                                                                                                                                          |                                                       |

|                                                                      |                                                                                 |                                                                                                       |                  |                                                                                                                                                                                                                                                     |                                                                                                                                                                                                                  |
|----------------------------------------------------------------------|---------------------------------------------------------------------------------|-------------------------------------------------------------------------------------------------------|------------------|-----------------------------------------------------------------------------------------------------------------------------------------------------------------------------------------------------------------------------------------------------|------------------------------------------------------------------------------------------------------------------------------------------------------------------------------------------------------------------|
| delivery including face to face; groups; mail; newsletters and phone | interventions to identify the key elements contributing to intervention success | comparison group; duration of 3 months or over; follow-up < 3 months; family studies targeting adults | Sample = unclear | social support; problem solving; goal setting; stress and time management; relapse prevention; self-weighting; cognitive and behavior change strategies; personalized contact; newsletters; email and phone contact; incentives; booklet; pedometer | treatment groups. Weight loss range of 1 to 1.9 kg. Five studies reported significant weight loss. Few trials on weight gain prevention. Low intensity multicomponent interventions identified as most effective |
| 1998 to 2008                                                         |                                                                                 |                                                                                                       |                  |                                                                                                                                                                                                                                                     |                                                                                                                                                                                                                  |
| OQAQ=10                                                              |                                                                                 |                                                                                                       |                  |                                                                                                                                                                                                                                                     |                                                                                                                                                                                                                  |

|                |                                                                                      |                                                                                                                                             |                                                                                                                                                                              |                                                                                                                                             |             |                                                                                                                                                                                                                                                                                            |                                                                                                                                                                                                      |
|----------------|--------------------------------------------------------------------------------------|---------------------------------------------------------------------------------------------------------------------------------------------|------------------------------------------------------------------------------------------------------------------------------------------------------------------------------|---------------------------------------------------------------------------------------------------------------------------------------------|-------------|--------------------------------------------------------------------------------------------------------------------------------------------------------------------------------------------------------------------------------------------------------------------------------------------|------------------------------------------------------------------------------------------------------------------------------------------------------------------------------------------------------|
| Loveman (2011) | Descriptive<br>Multicomponent<br>No restrictions (from inception to 2009)<br>OQAQ=18 | To evaluate the long-term cost and clinical effectiveness of multicomponent weight management interventions for weight loss and maintenance | Inclusion: RCT; adults ( $\geq 18$ years); overweight or obese; structured multicomponent weight management programmes; diet, PA or both; lifestyle behavior change strategy | Interventions = 12<br>N= 59-1191<br>Sample = predominately white females. However, some studies did not mention participant characteristics | Weight loss | Self-monitoring; goal setting; individual based problem solving; incentives; stages of change; rewards; stress management; modelling; assertiveness training; cognitive behavioral strategies; relapse prevention model; pocket diaries; lotteries to encourage attendance; questionnaires | 10/12 relevant studies. Did not synthesize quantitative data. Weight lost in overweight and obese adults, but not clinically significant. Effectiveness remains unclear. No UK RCT studies in review |
|----------------|--------------------------------------------------------------------------------------|---------------------------------------------------------------------------------------------------------------------------------------------|------------------------------------------------------------------------------------------------------------------------------------------------------------------------------|---------------------------------------------------------------------------------------------------------------------------------------------|-------------|--------------------------------------------------------------------------------------------------------------------------------------------------------------------------------------------------------------------------------------------------------------------------------------------|------------------------------------------------------------------------------------------------------------------------------------------------------------------------------------------------------|

|                |                                                                                                                     |                                                                                                                                                                          |                                                                                                                                                                                                             |                                                                                                                                                                                                                            |                                  |                                                                                                                                                                                                                                                                                                                  |                                                                                                                                                                                                                                                                         |
|----------------|---------------------------------------------------------------------------------------------------------------------|--------------------------------------------------------------------------------------------------------------------------------------------------------------------------|-------------------------------------------------------------------------------------------------------------------------------------------------------------------------------------------------------------|----------------------------------------------------------------------------------------------------------------------------------------------------------------------------------------------------------------------------|----------------------------------|------------------------------------------------------------------------------------------------------------------------------------------------------------------------------------------------------------------------------------------------------------------------------------------------------------------|-------------------------------------------------------------------------------------------------------------------------------------------------------------------------------------------------------------------------------------------------------------------------|
| Manzoni (2011) | Descriptive<br>Internet-based<br>18 studies from previous review (Neve et al. 2010) and 2008 to 2011 for own review | To examine the effectiveness of web-based interventions for weight loss and maintenance                                                                                  | Inclusion: RCT; publication in a peer reviewed journal; overweight or obese adults; internet-based; weight loss or maintenance outcomes                                                                     | Interventions = 26<br>N= 8324<br>Sample = community; 77% female                                                                                                                                                            | Weight loss and maintenance      | Individual e-mail feedback; self-monitoring of weight and diet; exercise diaries                                                                                                                                                                                                                                 | 25/25 relevant studies. Heterogeneity found in most studies including duration of intervention, type of feedback, and social support tools. Findings inconclusive                                                                                                       |
| Neve (2010)    | OQAQ=13<br>Meta-analysis<br>Web-based<br>1995 to 2010<br>OQAQ=15                                                    | To examine the effectiveness of internet-based interventions for weight loss and weight maintenance and to identify the underlying components influencing weight control | Inclusion: RCT with one web-based intervention study arm; targets weight loss or maintenance; dietary or PA behavior change; 18 years or over; overweight or obese                                          | Interventions = 20<br>N= 5700<br>Sample = 77% female (3.7% unclear)                                                                                                                                                        | Percentage change in body weight | Behavioral therapy; individually tailored web-based programme; email feedback; motivational interviewing; telephone follow-up; human email counselling                                                                                                                                                           | 18/18 relevant studies. Three of six studies reported 5% or greater weight lost. Heterogeneity between studies. Effectiveness remains unclear. Require studies providing detailed descriptions of intervention content for meta-analyses                                |
| Norman (2007)  | Descriptive<br>E-health technology<br>No restrictions (from inception to 2007)<br>OQAQ=13                           | To provide a descriptive evaluation of interactive second generation e-health interventions to promote weight loss                                                       | Inclusion: RCT and quasi-experimental; published in scientific journal; PA; dietary behavior or a combination of both; baseline and follow-up measures; intervention feasibility or effectiveness; e-health | Interventions = 47<br>N=<br>PA = 28-655;<br>diet = 72-1578;<br>combination = 35-2121<br>Sample = unclear but female participants<br>PA = 64-100%;<br>diet = 70-100%;<br>combination = 49-100%; predominately white females | Weight loss and BMI              | Motivational tips; educational information; internet tailored newsletters; computerized assessment and feedback; electronic self-monitoring forms; diet analysis; chat room; bulletin board; therapist-led internet video sessions; online meetings and support; buddy program; animated fitness instructor; 24- | 12/49 relevant studies. Did not synthesize quantitative data. Small to medium effect sizes reported across e-health studies. Findings inconclusive. Require further studies to understand underlying mechanisms promoting dietary and physical activity behavior change |

|                   |                                                                                                                                                          |                                                                                                                             |                                                                                                                                                                                                             |                                                                                                   |                                |                                                                                                                                                             |                                                                                                                                                                                                                                               |
|-------------------|----------------------------------------------------------------------------------------------------------------------------------------------------------|-----------------------------------------------------------------------------------------------------------------------------|-------------------------------------------------------------------------------------------------------------------------------------------------------------------------------------------------------------|---------------------------------------------------------------------------------------------------|--------------------------------|-------------------------------------------------------------------------------------------------------------------------------------------------------------|-----------------------------------------------------------------------------------------------------------------------------------------------------------------------------------------------------------------------------------------------|
|                   |                                                                                                                                                          |                                                                                                                             |                                                                                                                                                                                                             |                                                                                                   |                                | hour help desk;<br>e-mail reminders; goal setting; interactive multi-media (IMM); CD-ROM; interactive phone technology                                      |                                                                                                                                                                                                                                               |
| Reed (2011)       | Meta-analysis<br><br>Internet-based<br><br>No restriction date reported<br><br>OQAQ=17                                                                   | To investigate the influence of computer technology on weight loss interventions                                            | Inclusion: RCT; computer-based education or support; non-computer-based comparison group; overweight or obese adults; weight or BMI outcomes                                                                | Interventions = 13<br><br>N= 1866<br><br>Sample = means age = 49; 67% female; predominately white | Weight loss and BMI            | Paper diary; booklet; workbook; group therapy; in-person sessions; paper-based and phone counselling                                                        | 7/11 relevant studies. Computer-based interventions effective in weight loss but only when used in addition to standard weight loss programs. Sustaining weight loss over time remains unclear                                                |
| Saperstein (2007) | Descriptive<br><br>Internet-based<br><br>Not reported<br><br>OQAQ=9                                                                                      | To investigate the efficacy of the internet as a mode of delivery to facilitate weight loss.                                | Inclusion: RCT; internet-based weight lost programs; overweight or obese adults                                                                                                                             | Interventions = 6<br><br>N= NS<br><br>Sample = unclear                                            | Weight and waist circumference | Online logins; food diaries; online programs targeting dietary and PA changes, through cognitive and behavior strategies; personalized feedback and support | 6/6 relevant studies. Did not synthesize quantitative data. Internet-based tools could be effective for weight loss. Particularly, structured, personalized programs that include cognitive behavioral strategies                             |
| Tuah (2011)       | Descriptive<br><br>Range of methods incorporating the Transtheoretical Model and Stages of Change TTM SOC<br><br>No restriction (from inception to 2011) | To examine the effectiveness of PA and dietary programs that use the transtheoretical model (TTM) to facilitate weight loss | Inclusion: RCT; 18 years or over; overweight or obese; healthy adults; co-morbidities including diabetes, heart diseases and hypertension; use of TTM SOC model; tailored lifestyle modification strategies | Interventions = 5<br><br>N= 3910<br><br>Sample = age range from 25-75, predominately white        | Weight loss                    | TTM SOC; self-monitoring; feedback; personalized assessment report quarterly telephone; newsletters; manuals; pedometers; face to face counselling          | 2/5 relevant studies. Interventions utilising TTM SOC induced small weight change, but weight lost unsustainable over time. Heterogeneity across outcomes and interventions with small to medium samples. TTM SOC ineffective for weight loss |

|                  |                                                                              |                                                                                                                                     |                                                                                                                                    |                                                                                               |                             |                                                                                                                                                                                                                               |                                                                                                                                                                                  |
|------------------|------------------------------------------------------------------------------|-------------------------------------------------------------------------------------------------------------------------------------|------------------------------------------------------------------------------------------------------------------------------------|-----------------------------------------------------------------------------------------------|-----------------------------|-------------------------------------------------------------------------------------------------------------------------------------------------------------------------------------------------------------------------------|----------------------------------------------------------------------------------------------------------------------------------------------------------------------------------|
|                  |                                                                              | OQAAQ=18                                                                                                                            |                                                                                                                                    |                                                                                               |                             |                                                                                                                                                                                                                               |                                                                                                                                                                                  |
| Turk (2009)      | Descriptive<br>Clinical, therapy and self-delivered modality<br>1984 to 2007 | To summarize the findings of RCT interventions that assess strategies for maintenance of weight and the viability of these programs | Inclusion: RCT; weight maintenance; adult population; English language; true experimental design; randomly assigned at maintenance | Interventions = 40<br>N= unclear<br>Sample = predominately white                              | Weight maintenance          | Self-monitoring; self-weighing; chatroom; weekly weights online; 3-day food diaries; healthy diet educational materials; pedometers                                                                                           | 8/40 relevant studies. Mixed results. No difference in weight maintenance when compared to in-person interventions in two relevant studies                                       |
|                  |                                                                              | OQAAQ=11                                                                                                                            |                                                                                                                                    |                                                                                               |                             |                                                                                                                                                                                                                               |                                                                                                                                                                                  |
| Weinstein (2006) | Descriptive<br>Internet-based<br>1995 to 2006                                | To investigate the efficacy of weight loss programs delivered via the internet                                                      | Inclusion: RCT; publication in peer reviewed journal; overweight or obese adults; internet-based interventions; weight loss        | Interventions = 8<br>N= 418<br>Sample = age range from 30-62; 55% female; predominately white | Weight loss and maintenance | Weekly feedback; email; bulletin board support; email from therapist; e-counselling; food diaries; tailored health information and phone support                                                                              | 8/8 relevant studies. No quantitative synthesis. Weight loss range of 0.8 to 2.2kg across 5 studies. Internet weight-loss effectiveness similar to standard weight loss programs |
|                  |                                                                              | OQAAQ=12                                                                                                                            |                                                                                                                                    |                                                                                               |                             |                                                                                                                                                                                                                               |                                                                                                                                                                                  |
| Wieland (2012)   | Meta-analysis<br>Computer-based<br>From inception to 2011                    | To examine the effectiveness of interactive computer-based interventions for weight loss or weight maintenance                      | Inclusion: RCT and quasi-randomized trials; computer-based interventions; interactive programs; overweight or obese adults         | Interventions = 18<br>N = 4140<br>Sample = predominately white                                | Weight loss and maintenance | Interactive; weekly online chats; weekly email feedback; electronic bulletin board; e-mailed individualized feedback; e-mail counselling; online self-monitoring; online education or online behavior therapy; message boards | 18/18 relevant studies. Interactive computer-based interventions are more effective than minimal (usual care, pamphlets) or no interventions                                     |
|                  |                                                                              | OQAAQ=18                                                                                                                            |                                                                                                                                    |                                                                                               |                             |                                                                                                                                                                                                                               |                                                                                                                                                                                  |
